# Supplementary material
Source: PubMed Central journal article supplement (PMC10592091)
Supplement: NIHMS1926555-supplement-Supp3.pdf [file NIHMS1926555-supplement-Supp3.pdf]

**Supplementary Table 1. Characteristics of 36 patients with gastric cancer in Local cohort**

| Number | Patient code | Age | Sex    | Histopathological diagnosis | Tumor site | AJCC stage | immune_p henotype | CD8 center | CD8 margin |
|--------|--------------|-----|--------|-----------------------------|------------|------------|-------------------|------------|------------|
| 1      | NXH          | 70  | Male   | Adenocarcinoma              | Cardia     | IIA        | Inflamed          | 34         | 77         |
| 2      | ZYM          | 60  | Female | Adenocarcinoma              | Mixed      | IIIB       | Inflamed          | 124        | 66         |
| 3      | WCH          | 65  | Male   | Adenocarcinoma              | Antrum     | IIIC       | Inflamed          | 138        | 94         |
| 4      | ZAJ          | 72  | Female | Adenocarcinoma              | Body       | IIIC       | Excluded          | 1          | 47         |
| 5      | CCQ          | 74  | Male   | Adenocarcinoma              | Cardia     | IIB        | Excluded          | 10         | 154        |
| 6      | FZJ          | 64  | Male   | Adenocarcinoma              | Cardia     | IIIA       | Excluded          | 4          | 43         |
| 7      | LYH          | 73  | Male   | Adenocarcinoma              | Cardia     | IIB        | Inflamed          | 57         | 56         |
| 8      | CMS          | 61  | Male   | Adenocarcinoma              | Cardia     | IIIB       | Excluded          | 5          | 67         |
| 9      | LSX          | 74  | Male   | Adenocarcinoma              | Cardia     | IA         | Desert            | 4          | 1          |
| 10     | CWT          | 70  | Male   | Adenocarcinoma              | Cardia     | IA         | Desert            | 2          | 5          |
| 11     | LJH          | 51  | Male   | Adenocarcinoma              | Antrum     | IIIC       | Excluded          | 6          | 32         |
| 12     | ZMF          | 71  | Male   | Adenocarcinoma              | Antrum     | IIIB       | Inflamed          | 135        | 104        |
| 13     | LYQ          | 66  | Male   | Adenocarcinoma              | Cardia     | IIIA       | Excluded          | 8          | 137        |
| 14     | LYJ          | 70  | Female | Adenocarcinoma              | Cardia     | IIIA       | Excluded          | 5          | 102        |
| 15     | YTF          | 79  | Male   | Adenocarcinoma              | Cardia     | IIIA       | Inflamed          | 18         | 68         |
| 16     | QLZ          | 73  | Female | Adenocarcinoma              | Body       | IIB        | Excluded          | 1          | 101        |
| 17     | XHY          | 55  | Female | Adenocarcinoma              | Body       | IIIB       | Desert            | 12         | 14         |
| 18     | LHG          | 54  | Male   | Adenocarcinoma              | Antrum     | IIIB       | Inflamed          | 102        | 68         |
| 19     | ZDL          | 44  | Male   | Adenocarcinoma              | Antrum     | IIIA       | Excluded          | 0          | 89         |
| 20     | CBJ          | 72  | Male   | Adenocarcinoma              | Body       | IIIB       | Excluded          | 4          | 52         |
| 21     | LYW          | 65  | Male   | Adenocarcinoma              | Cardia     | IIIA       | Desert            | 5          | 8          |
| 22     | LDC          | 52  | Male   | Adenocarcinoma              | Cardia     | IIA        | Excluded          | 0          | 21         |
| 23     | LYH          | 69  | Female | Adenocarcinoma              | Antrum     | IB         | Inflamed          | 78         | 89         |
| 24     | YJF          | 66  | Male   | Adenocarcinoma              | Cardia     | IIIC       | Excluded          | 0          | 68         |
| 25     | PSQ          | 57  | Male   | Adenocarcinoma              | Antrum     | IIIB       | Excluded          | 0          | 55         |
| 26     | LYG          | 67  | Male   | Adenocarcinoma              | Body       | IIIC       | Excluded          | 1          | 52         |
| 27     | GXT          | 67  | Male   | Adenocarcinoma              | Cardia     | IIIB       | Desert            | 7          | 8          |
| 28     | QWJ          | 68  | Male   | Adenocarcinoma              | Antrum     | IIIA       | Inflamed          | 89         | 112        |
| 29     | JJB          | 68  | Male   | Adenocarcinoma              | Body       | IIIB       | Desert            | 1          | 6          |
| 30     | LJG          | 82  | Male   | Adenocarcinoma              | Cardia     | IIA        | Excluded          | 2          | 56         |
| 31     | HYM          | 58  | Female | Adenocarcinoma              | Cardia     | IIA        | Inflamed          | 158        | 67         |
| 32     | HJM          | 71  | Male   | Adenocarcinoma              | Cardia     | IIA        | Desert            | 3          | 2          |
| 33     | XXB          | 56  | Female | Adenocarcinoma              | Body       | IIB        | Desert            | 0          | 0          |
| 34     | LSB          | 64  | Male   | Adenocarcinoma              | Cardia     | IIB        | Inflamed          | 65         | 158        |
| 35     | WSJ          | 64  | Male   | Adenocarcinoma              | Antrum     | IIIA       | Inflamed          | 23         | 55         |
| 36     | JJX          | 62  | Female | Adenocarcinoma              | Body       | IIIB       | Excluded          | 21         | 110        |

**Supplementary Table 2. Gene expression profiles (GEPs)**

| T_cell_inflamed_GEP<br>symbol | EMT GEP (for bulk samples)<br>symbol | weight | EMT GEP (for cell lines)<br>symbol | weight |
|-------------------------------|--------------------------------------|--------|------------------------------------|--------|
| CXCR6                         | KRT19                                | -12.68 | CDH1                               | -18.83 |
| TIGIT                         | AGR2                                 | -12.52 | AGR2                               | -17.53 |
| CD27                          | RAB25                                | -12.37 | EPCAM                              | -16.72 |
| PDCD1LG2                      | CDH1                                 | -11.12 | KRT19                              | -16.52 |
| CD274                         | ERBB3                                | -10.31 | RAB25                              | -16.41 |
| CD8A                          | FXYD3                                | -10.1  | TACSTD2                            | -15.26 |
| LAG3                          | SLC44A4                              | -9.84  | S100P                              | -13.79 |
| NKG7                          | S100P                                | -9.05  | CEACAM6                            | -13.34 |
| CCL5                          | SCNN1A                               | -8.78  | GALNT3                             | -13.22 |
| CMKLR1                        | GALNT3                               | -8.75  | FXYD3                              | -13.01 |
| PSMB10                        | PRSS8                                | -8.39  | SPINT2                             | -12.4  |
| CXCL9                         | ELF3                                 | -8.32  | TMEM30B                            | -11.94 |
| IDO1                          | CEACAM6                              | -8.24  | SCNN1A                             | -11.45 |
| HLA-DQA1                      | TMPRSS4                              | -8.14  | ST14                               | -11.26 |
| CD276                         | CLDN7                                | -8.14  | ESRP1                              | -11.24 |
| STAT1                         | TACSTD2                              | -8.1   | S100A14                            | -10.88 |
| HLA-DQB1                      | CLDN3                                | -8.03  | CLDN7                              | -10.76 |
| HLA-E                         | EPCAM                                | -7.92  | ERBB3                              | -10.72 |
|                               | SPINT1                               | -7.56  | RBM47                              | -10.44 |
|                               | TSPAN1                               | -7.41  | SPINT1                             | -10.32 |
|                               | PLS1                                 | -7.39  | ELF3                               | -10.08 |
|                               | TMEM30B                              | -7.38  | CLDN4                              | -9.91  |
|                               | PRR15L                               | -7.26  | PRSS8                              | -9.84  |
|                               | KRT8                                 | -7.2   | SH3YL1                             | -9.75  |
|                               | ST14                                 | -7.11  | EHF                                | -9.46  |
|                               | RBM47                                | -7.03  | LCN2                               | -9.35  |
|                               | S100A14                              | -7.01  | JUP                                | -9.28  |
|                               | C1orf106                             | -7     | VAMP8                              | -9.28  |
|                               | NQO1                                 | -7     | KRT8                               | -8.86  |
|                               | TOX3                                 | -6.99  | C1orf106                           | -8.39  |
|                               | PTK6                                 | -6.95  | KRT7                               | -8.38  |
|                               | TFF1                                 | -6.87  | DSP                                | -8.35  |
|                               | CLDN4                                | -6.87  | CDS1                               | -8.28  |
|                               | GPRC5A                               | -6.87  | ITGB4                              | -8.11  |
|                               | TJP3                                 | -6.87  | TMPRSS4                            | -8.03  |
|                               | KRT18                                | -6.73  | LSR                                | -7.95  |
|                               | MAP7                                 | -6.56  | SORL1                              | -7.9   |
|                               | CKMT1A                               | -6.51  | GRHL2                              | -7.89  |
|                               | ESRP1                                | -6.47  | PPL                                | -7.84  |
|                               | MUC1                                 | -6.4   | C1orf116                           | -7.83  |
|                               | SPINT2                               | -6.25  | TSPAN1                             | -7.76  |

|           |                 |       |
|-----------|-----------------|-------|
| ESRP2     | -6.2 MAP7       | -7.61 |
| CDS1      | -6.14 SLPI      | -7.41 |
| PPAP2C    | -6.08 TOX3      | -7.24 |
| CEACAM7   | -6.05 ARHGAP8   | -7.13 |
| TTC39A    | -6.02 F11R      | -7.11 |
| OVOL2     | -5.9 LAD1       | -6.86 |
| EHF       | -5.88 GPX2      | -6.7  |
| AP1M2     | -5.83 CTSH      | -6.65 |
| CEACAM5   | -5.75 GPR56     | -6.62 |
| LAD1      | -5.7 FA2H       | -6.5  |
| ARHGAP8   | -5.63 KLF5      | -6.48 |
| TFF3      | -5.49 AREG      | -6.42 |
| JUP       | -5.47 KRT18     | -6.42 |
| CD24      | -5.45 SCEL      | -6.4  |
| TMC5      | -5.39 CDH3      | -6.34 |
| MLPH      | -5.38 UGT1A1    | -6.33 |
| ELMO3     | -5.33 MPZL2     | -6.15 |
| ERBB2     | -5.16 AIM1      | -6.13 |
| LLGL2     | -5.11 OVOL2     | -6.07 |
| DDR1      | -5.1 LLGL2      | -6.05 |
| FA2H      | -5.06 ESRP2     | -6.02 |
| CBLC      | -4.95 MYO5C     | -6.01 |
| TMPRSS2   | -4.95 DDR1      | -5.98 |
| LSR       | -4.93 VGLL1     | -5.91 |
| PERP      | -4.86 IRF6      | -5.89 |
| POF1B     | -4.81 SFN       | -5.88 |
| MYO5C     | -4.8 TSPAN13    | -5.85 |
| RAB11FIP1 | -4.76 KCNK1     | -5.81 |
| MAPK13    | -4.75 MYO1D     | -5.72 |
| KRT7      | -4.74 PKP3      | -5.7  |
| CEACAM1   | -4.69 ITGB6     | -5.69 |
| CXADR     | -4.68 LY75      | -5.65 |
| ATP2C2    | -4.65 MAPK13    | -5.59 |
| RNF128    | -4.64 TTC39A    | -5.57 |
| MPZL2     | -4.61 ELMO3     | -5.49 |
| EPS8L1    | -4.58 CEACAM1   | -5.37 |
| GALNT7    | -4.45 DTX4      | -5.36 |
| CORO2A    | -4.43 ERBB2     | -5.32 |
| BCAS1     | -4.41 RAB11FIP1 | -5.32 |
| TPD52     | -4.36 ATP2C2    | -5.28 |
| ARHGAP32  | -4.26 MST1R     | -5.28 |
| FUT2      | -4.25 AP1M2     | -5.27 |
| OR7E14P   | -4.22 TGFA      | -5.21 |
| GALE      | -4.16 MYO6      | -5.14 |

|          |       |           |       |
|----------|-------|-----------|-------|
| GRHL2    | -4.14 | PTK6      | -5.09 |
| BIK      | -4.1  | OAS1      | -5.08 |
| RAPGEFL1 | -4.07 | FBP1      | -5    |
| STYK1    | -4.05 | AQP3      | -4.97 |
| F11R     | -4.04 | CBLC      | -4.94 |
| PKP3     | -4.03 | EPHA1     | -4.93 |
| CYB561   | -4.03 | BSPRY     | -4.92 |
| SH3YL1   | -3.95 | SH2D3A    | -4.9  |
| GDF15    | -3.93 | EPS8L1    | -4.9  |
| PSCA     | -3.92 | GRB7      | -4.83 |
| EZR      | -3.88 | C4orf19   | -4.81 |
| TJP2     | -3.87 | KLK6      | -4.75 |
| FGFR3    | -3.86 | TJP2      | -4.75 |
| FUT3     | -3.85 | PLS1      | -4.75 |
| BSPRY    | -3.84 | DENND2D   | -4.73 |
| TOM1L1   | -3.82 | EPS8L2    | -4.59 |
| IRF6     | -3.74 | IL20RA    | -4.59 |
| EPB41L4B | -3.74 | HES1      | -4.57 |
| SPDEF    | -3.72 | IL1RN     | -4.54 |
| OCN      | -3.7  | EXPH5     | -4.5  |
| LRRC1    | -3.65 | ARHGDIB   | -4.49 |
| C19orf21 | -3.64 | C19orf21  | -4.47 |
| ABHD11   | -3.57 | CAMK2N1   | -4.46 |
| EPS8L2   | -3.55 | HPGD      | -4.44 |
| MYO6     | -3.55 | SYNGR2    | -4.44 |
| TSPAN8   | -3.53 | C10orf116 | -4.43 |
| MST1R    | -3.5  | PERP      | -4.42 |
| SLC16A5  | -3.5  | MANSC1    | -4.37 |
| GPR56    | -3.47 | DSC2      | -4.33 |
| AZGP1    | -3.47 | POF1B     | -4.3  |
| TOB1     | -3.43 | SERINC5   | -4.27 |
| SLC35A3  | -3.42 | BIK       | -4.25 |
| TRPM4    | -3.42 | ANXA9     | -4.25 |
| PHLDA2   | -3.42 | MALL      | -4.24 |
| VAMP8    | -3.42 | EPN3      | -4.23 |
| SLC22A18 | -3.42 | STAP2     | -4.23 |
| AKR1B10  | -3.4  | FOXA1     | -4.2  |
| VAV3     | -3.38 | PYCARD    | -4.2  |
| SPAG1    | -3.38 | ZNF165    | -4.17 |
| ABCC3    | -3.37 | SLC37A1   | -4.14 |
| SYNGR2   | -3.37 | ANK3      | -4.02 |
| STAP2    | -3.28 | TSPAN15   | -4.01 |
| C4orf19  | -3.28 | HNMT      | -4.01 |
| PPL      | -3.27 | ABCC3     | -4.01 |

|          |               |       |
|----------|---------------|-------|
| PLLP     | -3.26 SDC1    | -4    |
| DSG2     | -3.26 CKMT1A  | -3.99 |
| HDHD3    | -3.25 TOB1    | -3.98 |
| CD2AP    | -3.25 B3GNT3  | -3.96 |
| MANSC1   | -3.24 TMC6    | -3.93 |
| DHCR24   | -3.24 CD9     | -3.89 |
| EPN3     | -3.23 ADAP1   | -3.88 |
| TUFT1    | -3.22 ATP1B1  | -3.86 |
| GMDS     | -3.22 SHANK2  | -3.81 |
| EXPH5    | -3.18 CYB561  | -3.81 |
| DSP      | -3.17 ERMP1   | -3.78 |
| SDC4     | -3.17 RAB20   | -3.75 |
| IL20RA   | -3.13 MYH14   | -3.73 |
| FAM174B  | -3.13 CAPN1   | -3.69 |
| PTPRF    | -3.11 ALDH3B2 | -3.65 |
| SORD     | -3.1 TRIM31   | -3.65 |
| GAS1     | 8.43 ARAP2    | -3.64 |
| CXCL12   | 7.13 SSH3     | -3.61 |
| ZEB1     | 6.56 ICA1     | -3.55 |
| GLYR1    | 6.18 ARHGEF5  | -3.54 |
| FHL1     | 6.15 ALOX5    | -3.52 |
| FERMT2   | 6.06 RHOD     | -3.44 |
| C1S      | 5.84 Tmprss2  | -3.43 |
| FYN      | 5.84 MTUS1    | -3.41 |
| WIPF1    | 5.8 CYP4F3    | -3.37 |
| CYP1B1   | 5.56 PPFIBP2  | -3.36 |
| SERPING1 | 5.63 RABGAP1L | -3.36 |
| SERPINF1 | 5.48 PLXNB2   | -3.33 |
| VCAM1    | 5.4 MGST2     | -3.31 |
| MAP1B    | 5.39 OR7E14P  | -3.3  |
| TCF4     | 5.33 EVPL     | -3.3  |
| SRPX     | 5.31 CD46     | -3.28 |
| EMP3     | 5.29 KRT15    | -3.22 |
| DPT      | 5.24 CNKSR1   | -3.2  |
| CALD1    | 5.21 BLNK     | -3.17 |
| PTGIS    | 5.11 COMT     | -3.16 |
| VIM      | 5.04 ANXA4    | -3.15 |
| CD163    | 5.04 TNFSF13  | -3.15 |
| C1R      | 5.02 OCLN     | -3.14 |
| FBN1     | 5.02 SLC9A3R1 | -3.14 |
| FN1      | 4.94 XBP1     | -3.11 |
| FXVD6    | 4.86 VIM      | 12.31 |
| IGF1     | 4.82 ZEB1     | 11.4  |
| NAP1L3   | 4.81 EMP3     | 10.27 |

|           |               |      |
|-----------|---------------|------|
| MRC1      | 4.74 SACS     | 7.56 |
| QKI       | 4.67 AXL      | 7.29 |
| MS4A4A    | 4.65 LOXL2    | 6.57 |
| DCN       | 4.64 SPARC    | 6.51 |
| LOX       | 4.53 FHL1     | 6.45 |
| RECK      | 4.53 FERMT2   | 6.42 |
| ANK2      | 4.53 TUBA1A   | 6.32 |
| LY96      | 4.5 TMEM158   | 6.09 |
| ZFPM2     | 4.46 CALD1    | 5.94 |
| CSRP2     | 4.45 LGALS1   | 5.92 |
| EFEMP1    | 4.44 PMP22    | 5.89 |
| RARRES2   | 4.38 MSN      | 5.51 |
| PTPRC     | 4.34 GLYR1    | 5.38 |
| PLEKHO1   | 4.33 MAP1B    | 5.24 |
| RGS2      | 4.32 AP1S2    | 5.13 |
| F13A1     | 4.31 GJA1     | 4.8  |
| JAM2      | 4.25 DENND5A  | 4.75 |
| CHRDL1    | 4.22 C12orf24 | 4.7  |
| TUBA1A    | 4.21 TPM2     | 4.65 |
| AP1S2     | 4.19 TUBB6    | 4.63 |
| MYLK      | 4.17 SRPX     | 4.48 |
| DDR2      | 4.17 ANK2     | 4.18 |
| DSE       | 4.17 CHN1     | 4.06 |
| SACS      | 4.17 SH2B3    | 4.06 |
| GLIPR1    | 4.16 LEPRE1   | 3.9  |
| CXCL13    | 4.15 ETV1     | 3.84 |
| FLRT2     | 4.13 SOBP     | 3.81 |
| PTX3      | 4.12 AKAP12   | 3.78 |
| AKT3      | 4.1 TGFB1I1   | 3.75 |
| COL6A2    | 4.07 SERPINE1 | 3.7  |
| DPYSL3    | 4.06 SOAT1    | 3.69 |
| CDH11     | 4.04 COL5A2   | 3.61 |
| PDZRN3    | 4.02 LHFP     | 3.6  |
| ZEB2      | 4.01 CEP170   | 3.57 |
| CCL2      | 4.01 POPDC3   | 3.54 |
| MAFB      | 3.99 TRPC1    | 3.53 |
| SFRP1     | 3.98 KDELC1   | 3.44 |
| C14orf139 | 3.97 MYL9     | 3.36 |
| MFAP4     | 3.96 BAG2     | 3.36 |
| MAF       | 3.95 FSTL1    | 3.34 |
| UCHL1     | 3.94 MXRA7    | 3.34 |
| TUBB6     | 3.93 GFPT2    | 3.33 |
| SRGN      | 3.91 RECK     | 3.29 |
| HEG1      | 3.91 TMEFF1   | 3.22 |

|         |           |      |
|---------|-----------|------|
| KCNJ8   | 3.86 PTRF | 3.14 |
| AKAP12  | 3.85      |      |
| EVI2A   | 3.84      |      |
| COL14A1 | 3.84      |      |
| AXL     | 3.82      |      |
| ECM2    | 3.81      |      |
| FSTL1   | 3.79      |      |
| PLN     | 3.77      |      |
| MYL9    | 3.77      |      |
| OLFML3  | 3.76      |      |
| STON1   | 3.75      |      |
| SLIT2   | 3.75      |      |
| BICC1   | 3.75      |      |
| SOBP    | 3.75      |      |
| CLIC4   | 3.74      |      |
| ENPP2   | 3.73      |      |
| SAMSN1  | 3.72      |      |
| TPM2    | 3.7       |      |
| ASPN    | 3.7       |      |
| COL6A1  | 3.69      |      |
| IGFBP5  | 3.68      |      |
| MOXD1   | 3.68      |      |
| AKAP2   | 3.68      |      |
| SLC2A3  | 3.67      |      |
| OLFML2B | 3.65      |      |
| ANGPTL2 | 3.64      |      |
| PCOLCE  | 3.62      |      |
| COLEC12 | 3.62      |      |
| CTSK    | 3.62      |      |
| TAGLN   | 3.6       |      |
| CDH2    | 3.6       |      |
| IL10RA  | 3.6       |      |
| C1orf54 | 3.6       |      |
| CEP170  | 3.59      |      |
| TNS1    | 3.59      |      |
| CLEC2B  | 3.58      |      |
| JAM3    | 3.57      |      |
| SEPT6   | 3.56      |      |
| GREM1   | 3.55      |      |
| VCAN    | 3.54      |      |
| ZCCHC24 | 3.54      |      |
| CRYAB   | 3.54      |      |
| SFRP4   | 3.53      |      |
| RUNX1T1 | 3.52      |      |

|          |      |
|----------|------|
| FGL2     | 3.51 |
| MS4A6A   | 3.51 |
| PTRF     | 3.48 |
| GIMAP4   | 3.48 |
| TWIST1   | 3.48 |
| GFPT2    | 3.47 |
| LHFP     | 3.47 |
| CXCR4    | 3.47 |
| SPOCK1   | 3.46 |
| SPARC    | 3.46 |
| VSIG4    | 3.44 |
| GPM6B    | 3.42 |
| TRPC1    | 3.41 |
| SNAI2    | 3.39 |
| GUCY1B3  | 3.37 |
| PLXNC1   | 3.36 |
| SYT11    | 3.36 |
| FLI1     | 3.36 |
| MYH10    | 3.35 |
| CSF2RB   | 3.34 |
| TNC      | 3.34 |
| PMP22    | 3.34 |
| COL5A2   | 3.34 |
| MMP2     | 3.33 |
| GNG11    | 3.33 |
| CAV1     | 3.31 |
| CDK14    | 3.3  |
| SDC2     | 3.3  |
| PTGDS    | 3.3  |
| NR3C1    | 3.29 |
| SYNM     | 3.29 |
| FAP      | 3.28 |
| NUAK1    | 3.28 |
| WWTR1    | 3.26 |
| FBLN1    | 3.26 |
| MPDZ     | 3.23 |
| SYNE1    | 3.23 |
| EFEMP2   | 3.22 |
| GIMAP6   | 3.2  |
| KIAA1462 | 3.2  |
| CCL8     | 3.2  |
| COL15A1  | 3.2  |
| CHN1     | 3.2  |
| CRISPLD2 | 3.19 |



|         |      |
|---------|------|
| PDGFC   | 3.18 |
| GEM     | 3.17 |
| ISLR    | 3.14 |
| GZMK    | 3.14 |
| SPARCL1 | 3.14 |
| BNC2    | 3.12 |
| BGN     | 3.12 |
| MEOX2   | 3.1  |
| ITM2A   | 3.1  |
| IFFO1   | 3.1  |

**Supplementary Table 3. Reagents and Kits**

| <b>Name</b>                                                       | <b>Source</b>                    | <b>Catalogue Number</b> |
|-------------------------------------------------------------------|----------------------------------|-------------------------|
| 2nd Generation packaging                                          | Abmgood                          | LV003                   |
| Polybrene                                                         | Sigma-aldrich                    | TR-1003                 |
| LipoJet Reagent                                                   | Signagen                         | #SL100468               |
| PolyJet Reagent                                                   | Signagen                         | #SL100688               |
| Recombinant Human FGF-basic (154 a.a.)                            | peprotech                        | 100-18B                 |
| Recombinant Human PDGF-BB                                         | peprotech                        | 100-14B                 |
| Recombinant Human TGF-β1                                          | peprotech                        | 100-21                  |
| Recombinant Human IFN-gamma Protein                               | novusbio                         | NBP2-34992              |
| ChIP-IT Express Enzymatic                                         | Active motif                     | #53039                  |
| ChIP-IT High Sensitivity                                          | Active motif                     | #53040                  |
| Dovitinib (TKI-258)                                               | Selleckchem                      | S1018                   |
| Lenvatinib                                                        | Selleckchem                      | S1164                   |
| Tivozanib                                                         | Selleckchem                      | S1207                   |
| Collagenase A, ACF                                                | STEMCELL Technologies Inc        | # 07435                 |
| Corning™ MITO+ Serum Extender                                     | Thomas Scientific                | No. 355006              |
| eBioscience™ Intracellular Fixation & Permeabilization Buffer Set | thermofisher                     | 88-8824-00              |
| eBioscience™ Flow Cytometry Staining Buffer                       | thermofisher                     | 00-4222-26              |
| pLX317-SNAI1                                                      | Addgene                          | #115446                 |
| SNAI 1 siRNA (h)                                                  | Santa cruz                       | sc-38398                |
| SlugMyc_pcDNA3                                                    | Addgene                          | #31698                  |
| siSlug1                                                           | Addgene                          | #10903                  |
| 3.6kb human IFN-gamma luc                                         | Addgene                          | #17599                  |
| 53 bp human IFN-gamma luc                                         | Addgene                          | #17597                  |
| PL-CRISPR.EFS.tRFP-gIfngr1-2                                      | Addgene                          | #166480                 |
| Corning® BioCoat™ Matrigel® Invasion Chambers                     | WORLDWIDE MEDICAL PRODUCTS, INC. | #354480                 |
| 6.5 mm Transwell® with 8.0 μm Pore Polycarbonate Membrane Insert  | Thomas Scientific                | #3422                   |
| Ficoll-Paque® PLUS Medium                                         | VWR                              | 95021-205               |
| CellTreat Permeable Cell Culture Inserts                          | stellarscientific                | CT230603                |
| Amicon® Ultra-4 Centrifugal Filter Units                          | Millipore-sigma                  | UFC801024               |
| CXCL9/MIG elisa kit :: Mouse CXCL9/MIG ELISA Kit                  | mybiosource                      | MBS2501424              |
| MIG/CXCL9 ELISA Kit, Human                                        | sinobiologica                    | KIT10888                |
| IFNg elisa kit :: Human Interferon Gamma (IFNg)                   | mybiosource                      | MBS2700895              |
| IFNg elisa kit :: Mouse Interferon Gamma (IFNg)                   | mybiosource                      | MBS2700896              |
| Recombinant Human IL-2 10ug                                       | peprotech                        | 200-02                  |
| Streptavidin MicroBeads, (for 1×10 <sup>9</sup> total cells)      | miltenyibiotec                   | 130-048-102             |
| MS Columns plus tubes                                             | miltenyibiotec                   | 130-122-727             |
| CD3 Monoclonal Antibody (UCHT1), Biotin                           | Thermofisher                     | 13-0038-82              |
| Corning® Matrigel® Basement Membrane Matrix                       | Corning                          | #354234                 |
| Gibco™ HEPES (1M)                                                 | fisher scientific                | 15-630-080              |
| Dulbecco's Modified Eagle's Medium - high glucose                 | Sigma-Aldrich                    | D6429-6X500ML           |

**Supplementary Table 4. Antibodies and dilutions**

| Antibody                                                         | Source                  | Catalogue Number | Application       | Working Dilution |
|------------------------------------------------------------------|-------------------------|------------------|-------------------|------------------|
| InVivoMAb anti-mouse IFN $\gamma$                                | BioXCell                | BE0054           | in vitro          | /                |
| InVivoMAb rat IgG1 Isotype control                               | BioXCell                | BE0290           | in vitro          | /                |
| Ultra-LEAF™ Purified anti-human IFN- $\gamma$                    | biolegend               | #506532          | in vitro          | /                |
| Ultra-LEAF™ Purified Mouse IgG1                                  | biolegend               | #400166          | in vitro          | /                |
| InVivoMAb anti-mouse CTLA-4 (CD152)                              | Bio x cell              | BE0032           | in vivo/in vitro  | /                |
| InVivoMAb polyclonal Armenian hamster IgG                        | Bio x cell              | BE0091           | in vivo           | /                |
| CD28 Monoclonal Antibody (CD28.2)                                | thermofisher scientific | 16-0289-81       | T cell activation | /                |
| CD3 Monoclonal Antibody (OKT3)                                   | thermofisher scientific | 16-0037-81       | T cell activation | /                |
| CD3 Monoclonal Antibody (OKT3)                                   | thermofisher scientific | 13-0037-82       | T cell isolation  | /                |
| Mouse CD3 Antibody                                               | rndsystems              | MAB4841-SP       | IF                | 1:200            |
| Human/Mouse FoxP3 Antibody                                       | rndsystems              | MAB8214-SP       | IF                | 1:200            |
| Mouse CD4 Antibody                                               | rndsystems              | MAB554-SP        | IF                | 1:200            |
| Mouse Granzyme B Antibody                                        | rndsystems              | AF1865-SP        | IF                | 1:200            |
| IFN-gamma Antibody [Unconjugated]                                | Novus Biologicals       | AF-585-SP        | IF                | 1:200            |
| Anti-CD8 alpha antibody [EPR21769]                               | abcam                   | ab217344         | IF                | 1:400            |
| PE/Dazzle™ 594 anti-mouse CD45 Antibody                          | biolegend               | #103145          | Flow cytometry    | 1:50             |
| Granzyme B Monoclonal Antibody (NGZB), PE-Cyanine7, eBioscience™ | thermofisher            | 25-8898-82       | Flow cytometry    | 1:50             |
| BB515 Rat Anti-Mouse CD8a                                        | BDBiosciences           | #564422          | Flow cytometry    | 1:50             |
| PE anti-mouse CD4 Antibody                                       | biolegend               | #100512          | Flow cytometry    | 1:50             |
| BD Horizon™ BV711 Hamster Anti-Mouse CD3e                        | BDBiosciences           | #563123          | Flow cytometry    | 1:50             |
| ZEB1 (E2G6Y) XP® Rabbit mAb                                      | Cell Signaling          | #70512           | WB                | 1:1000           |
| PDGF Receptor $\beta$ (28E1)                                     | Cell Signaling          | 3169T            | WB                | 1:1000           |
| Vimentin (D21H3) XP® Rabbit mAb                                  | Cell Signaling          | 5741S            | WB                | 1:1000           |
| E-Cadherin (4A2) Mouse mAb                                       | Cell Signaling          | 14472S           | WB                | 1:1000           |
| Stat1 (D1K9Y) Rabbit mAb #14994                                  | Cell Signaling          | 14994T           | WB                | 1:1000           |
| IRF-1 (D5E4) XP® Rabbit mAb #8478                                | Cell Signaling          | 8478T            | WB                | 1:1000           |
| Human/Mouse Phospho-STAT1 (Y701)                                 | R&D Systems             | AF2894-SP        | WB                | 1:1000           |
| CXCL9/MIG (E7X3P) Rabbit mAb                                     | Cell Signaling          | #93556           | WB                | 1:1000           |
| Snail (C15D3) Rabbit mAb                                         | Cell Signaling          | #3879            | WB,ChIP           | 1:1000           |
| FGF Receptor 1 (D8E4) XP®                                        | Cell Signaling          | #9740            | WB                | 1:1000           |
| Phospho-PDGF Receptor $\beta$ (Tyr751)                           | Cell Signaling          | #4549            | WB                | 1:1000           |
| IFN- $\gamma$ (3F1E3) Mouse mAb #3159                            | Cell Signaling          | #3159S           | WB                | 1:1000           |
| Anti-phospho-FGFR-1 (Tyr653/Tyr654)                              | Sigma-Aldrich           | 06-1433-25UG     | WB                | 1:1000           |
| anti-IFNGR1 antibody                                             | mybiosource             | MBS2523950       | WB                | 1:1000           |
| CD80 (E3Q9V) Rabbit mAb                                          | Cell Signaling          | #15416           | WB                | 1:1000           |
| Slug (C19G7) Rabbit mAb                                          | Cell Signaling          | #9585            | WB,ChIP           | 1:1000           |
| $\beta$ -actin                                                   | Sigma-Aldrich           | A1978            | WB                | 1:4000           |
| Stat3 (D3Z2G) Rabbit mAb                                         | Cell Signaling          | #12640s          | WB                | 1:1000           |
| Phospho-Stat3 (Tyr705) (M9C6) Mouse mAb                          | Cell Signaling          | #4113            | WB                | 1:1000           |
| p-AKT(S473)                                                      | Cell Signaling          | #4060            | WB                | 1:1000           |
| AKT                                                              | Cell Signaling          | #9272            | WB                | 1:1000           |
| MEK                                                              | Cell Signaling          | #9126            | WB                | 1:1000           |
| p-MEK(S217/221)                                                  | Cell Signaling          | #9154            | WB                | 1:1000           |
| HRP-coupled anti-mouse,anti-rabbit                               | Promega                 | W4021,W4011      | WB                | 1:4000           |
| Normal IgG                                                       | EMD Millipore corp.     | 3281600          | IP, ChIP          | /                |

**Supplementary Table 5. Oligonucleotide sequence of primers**

| gene name<br>(m:mouse,h:human) | Sequences               |                         | Assay           |
|--------------------------------|-------------------------|-------------------------|-----------------|
|                                | Forward                 | Reverse                 |                 |
| mCxcl9                         | GGAGTTCGAGGAACCCTAGTG   | GGGATTTGTAGTGGATCGTGC   | Regular qRT-PCR |
| mCxcl10                        | CCAAGTGCTGCCGTCATTTTC   | GGCTCGCAGGGATGATTTCAA   | Regular qRT-PCR |
| mCxcl11                        | GGCTTCCTTATGTTCAAACAGGG | GCCGTTACTCGGGTAAATTACA  | Regular qRT-PCR |
| mCxcl13                        | GGCCACGGTATTCTGGAAGC    | GGGCGTAACTTGAATCCGATCTA | Regular qRT-PCR |
| mCcl4                          | TTCCTGCTGTTTCTCTTACACCT | CTGTCTGCCTCTTTTGGTCAG   | Regular qRT-PCR |
| mCcl5                          | GCTGCTTTGCCTACCTCTCC    | TCGAGTGACAAACACGACTGC   | Regular qRT-PCR |
| mlfng                          | ATGAACGCTACACACTGCATC   | CCATCCTTTTGCCAGTTCCTC   | Regular qRT-PCR |
| mlfnb1                         | CAGCTCCAAGAAAGGACGAAC   | GGCAGTGTAACTCTTCTGCAT   | Regular qRT-PCR |
| hCXCL9                         | CCAGTAGTGAGAAAGGGTCGC   | AGGGCTTGGGGCAAATTGTT    | Regular qRT-PCR |
| hCXCL10                        | GTGGCATTCAAGGAGTACCTC   | TGATGGCCTTCGATTCTGGATT  | Regular qRT-PCR |
| hCXCL11                        | GACGCTGTCTTTGCATAGGC    | GGATTTAGGCATCGTTGTCTTT  | Regular qRT-PCR |
| hCXCL13                        | GCTTGAGGTGTAGATGTGTCC   | CCCACGGGGCAAAGATTGAA    | Regular qRT-PCR |
| hCCL4                          | CTGTGCTGATCCCAGTGAATC   | TCAGTTCAGTTCAGGTCATACA  | Regular qRT-PCR |
| hCCL5                          | CCAGCAGTCGTCTTTGTACAC   | CTCTGGGTTGGCACACACTT    | Regular qRT-PCR |
| hCCL18                         | GCTGCCTCGTCTATACCTCC    | CCGGCCTCTCTTGGTTAGGA    | Regular qRT-PCR |
| hIFNG                          | TCGGTAACTGACTTGAATGTCCA | TCGCTCCCTGTTTTAGCTGC    | Regular qRT-PCR |
| hIFNA1                         | GCCTCGCCCTTTGCTTTACT    | CTGTGGGTCTCAGGGAGATCA   | Regular qRT-PCR |
| hIFNB1                         | ATGACCAACAAGTGTCTCCTCC  | GGAATCCAAGCAAGTTGTAGCTC | Regular qRT-PCR |
| hCD274                         | TGGCATTGCTGAACGCATT     | TGCAGCCAGGTCTAATTGTTTT  | Regular qRT-PCR |
| mCd274                         | GCTCCAAAGGACTTGTACGTG   | TGATCTGAAGGGCAGCATTTC   | Regular qRT-PCR |
| hCD80                          | AAACTCGCATCTACTGGCAAA   | GGTCTTGTACTCGGGCCATA    | Regular qRT-PCR |
| mCd80                          | ACCCCAACATAACTGAGTCT    | TTCCAACCAAGAGAAGCGAGG   | Regular qRT-PCR |
| hVIM                           | AGTCCACTGAGTACCGGAGAC   | CATTCACGCATCTGGCGTTC    | Regular qRT-PCR |
| mVim                           | CGGCTGCGAGAGAAATTGC     | CCACTTCCGTTCAAGGTCAAG   | Regular qRT-PCR |
| hCDH1                          | CGAGAGCTACACGTTACGG     | GGGTGTCGAGGGAAAAATAGG   | Regular qRT-PCR |
| mCdh1                          | CAGGTCTCCTCATGGCTTTGC   | CTTCCGAAAAGAAGGCTGTCC   | Regular qRT-PCR |
| IFNG-P1                        | GTGCCTTCAAAGAATCCCACC   | GGTTTTGTGGCATTGGGTGT    | Chip qRT-PCR    |
| IFNG-P2                        | ACGTAATCCTCAGGAGACTTCA  | GCTGATCAGGTCCAAGGACT    | Chip qRT-PCR    |

**Supplementary Table 6. Source of 14 patients with gastric cancer**

| <b>Number</b> | <b>Sample code</b> | <b>Source</b>       | <b>Age</b> | <b>Sex</b> | <b>Histopathological diagnosis</b> |
|---------------|--------------------|---------------------|------------|------------|------------------------------------|
| 1             | 4060939            | CHTN                | 71         | F          | PD adenocarcinoma                  |
| 2             | 4060718            | CHTN                | 79         | F          | MD adenocarcinoma                  |
| 3             | 1061129            | CHTN                | 56         | M          | MD adenocarcinoma                  |
| 4             | 12021              | University of Miami | NA         | NA         | PD adenocarcinoma                  |
| 5             | 1820               | University of Miami | NA         | NA         | PD adenocarcinoma                  |
| 6             | 1070328            | CHTN                | 43         | M          | MD to PD adenocarcinoma            |
| 7             | 4070168A           | CHTN                | 51         | M          | MD to PD adenocarcinoma            |
| 8             | 1060239            | CHTN                | 68         | M          | adenocarcinoma                     |
| 9             | 4008126            | CHTN                | 83         | F          | signet ring carcinoma              |
| 10            | 1060214            | CHTN                | 83         | M          | MD to PD adenocarcinoma            |
| 11            | 4060649            | CHTN                | 72         | M          | PD adenocarcinoma                  |
| 12            | 01-12-1027A        | CHTN                | NA         | NA         | adenocarcinoma                     |
| 13            | 41940A3B           | CHTN                | 76         | M          | adenocarcinoma                     |
| 14            | 41018A1D           | CHTN                | 60         | M          | adenocarcinoma                     |

CHTN: Cooperative Human Tissue Network

NA: not available
